# Supplementary material for: Expression and differential regulation of human TERRA at several chromosome ends
Source: PubMed Central journal article supplement — RNA. 2019 Nov;25(11):1470–80. doi: 10.1261/rna.072322.119 (PMC6795134; doi:10.1261/rna.072322.119), 2019-11
Supplement: supp_072322.119_Supplemental_Table_S1.pdf [file supp_072322.119_Supplemental_Table_S1.pdf]

**Table S1.** qPCR Primers

| Primer          | Sequence (5' – 3')          | Reference                    |
|-----------------|-----------------------------|------------------------------|
| TERRA RT Primer | CCCTAACCCCTAACCCCTAACCCCTAA |                              |
| 1q Fw           | GCATTCCTAATGCACACATGAC      | (Feretzaki and Lingner 2017) |
| 1q Rev          | ACCCTAACCCGAACCCTA          |                              |
| 2p Fw           | GTAAAGGCGAAGCAGCATTCTCC     | (Sampl et al. 2012)          |
| 2p Rev          | TAAGCCGAAGCCTAACTCGTGTC     |                              |
| 7p Fw           | GGAGGCTGAGGCAGGAGAA         | (Deng et al. 2012)           |
| 7p Rev          | CAATCTCGGCTCACCACAATC       |                              |
| 9p Fw           | GAGATTCTCCCAAGGCAAGG        | (Feretzaki and Lingner 2017) |
| 9p Rev          | ACATGAGGAATGTGGGTGTTAT      |                              |
| 10q Fw          | ATGCACACATGACACCCTAAA       | (Feretzaki and Lingner 2017) |
| 10q Rev         | TACCCGAACCTGAACCCTAA        |                              |
| 12q Fw          | ATTCCCGTTTTCCACACTGA        | (Wang et al. 2015)           |
| 12q Rev         | CTGTTTGCAGCGCTGAATATTC      |                              |
| 13q Fw          | CTGCCTGCCTTTGGGATAA         | (Feretzaki and Lingner 2017) |
| 13q Rev         | AAACCGTTCTAACTGGTCTCTG      |                              |
| 15q Fw          | TGCAACCGGGAAAGATTTTATT      | (Feretzaki and Lingner 2017) |
| 15q Rev         | GCGTGGCTTTGGGACAAC          |                              |
| 16p Fw          | TGCAACCGGGAAAGATTTTATT      | (Deng et al. 2012)           |
| 16p Rev         | GCCTGGCTTTGGGACAAC          |                              |
| 17p Fw          | GGGACAGAAGTGGATAAGCTGATC    | (Deng et al. 2012)           |
| 17p Rev         | GATCCCACTGTTTTTATTACTGTTCT  |                              |
| 18p Fw          | TACCTCGCTTTGGGACAAC         | (Sampl et al. 2012)          |
| 18p Rev         | CCTAACCCCTCACCCTTCTAAC      |                              |
| 20q Fw          | GCAGCTTTCTCAGCACAC          | (Montero et al. 2016)        |
| 20q Rev         | TTTGTTCACTGTGATGCG          |                              |
| Xq Fw           | AGCAAGCGGGTCCTGTAGTG        | (Deng et al. 2012)           |
| Xq Rev          | GGTGGAACCTCAGTAATCCGAAA     |                              |
| GAPDH Fw        | GCGTGGCTTTGGGACAAC          |                              |
| GAPDH Rev       | AGCCACATCGCTCAGACAC         |                              |
| CTCF Fw         | GACCCACCCCTTCTTCAGATG       | (Deng et al. 2012)           |
| CTCF Rev        | CCACAGCAGCCTCTGCTTCT        |                              |

|            |                        |            |
|------------|------------------------|------------|
| ATRX Fw    | GGTGAAGGAAATGTGGATG    | This study |
| ATRX Rev   | CTGGGCTGCTTGGATTAGAA   |            |
| PLAG1 Fw   | ATTGTGATCGCCGGTTCTAC   | This study |
| PLAG1 Rev  | GATCCTTTCGCCCAAATCTCT  |            |
| EGR1 Fw    | CGCAAGAGGCATACCAAGAT   | This study |
| EGR1 Rev   | GTAGGAAGAGAGAGAGGAGGTG |            |
| ZFX Fw     | GTGCCCTCTTGACATAGAT    | This study |
| ZFX Rev    | GATGTCCATCAGGGCCAATAA  |            |
| ZNF148 Fw  | GCAGGCTTTGGACAGAACTA   | This study |
| ZNF148 Rev | GATTTGGGAGGGTCTGGTTATC |            |
